# Supplementary material for: Transformer-based biomarker prediction from colorectal cancer histology: A large-scale multicentric study
Source: PubMed Central journal article supplement (PMC10507381; doi:10.1016/j.ccell.2023.08.002), 2023-09-11
Supplement: mmc1.pdf [file mmc1.pdf]

## Supplemental information

### Transformer-based biomarker prediction from colorectal cancer histology: A large-scale multicentric study

Sophia J. Wagner, Daniel Reisenbüchler, Nicholas P. West, Jan Moritz Niehues, Jiefu Zhu, Sebastian Foersch, Gregory Patrick Veldhuizen, Philip Quirke, Heike I. Grabsch, Piet A. van den Brandt, Gordon G.A. Hutchins, Susan D. Richman, Tanwei Yuan, Rupert Langer, Josien C.A. Jenniskens, Kelly Offermans, Wolfram Mueller, Richard Gray, Stephen B. Gruber, Joel K. Greenson, Gad Rennert, Joseph D. Bonner, Daniel Schmolze, Jitendra Jonnagaddala, Nicholas J. Hawkins, Robyn L. Ward, Dion Morton, Matthew Seymour, Laura Magill, Marta Nowak, Jennifer Hay, Viktor H. Koelzer, David N. Church, TransSCOT consortium, Christian Matek, Carol Geppert, Chaolong Peng, Cheng Zhi, Xiaoming Ouyang, Jacqueline A. James, Maurice B. Loughrey, Manuel Salto-Tellez, Hermann Brenner, Michael Hoffmeister, Daniel Truhn, Julia A. Schnabel, Melanie Boxberg, Tingying Peng, and Jakob Nikolas Kather

# Supplementary Figures

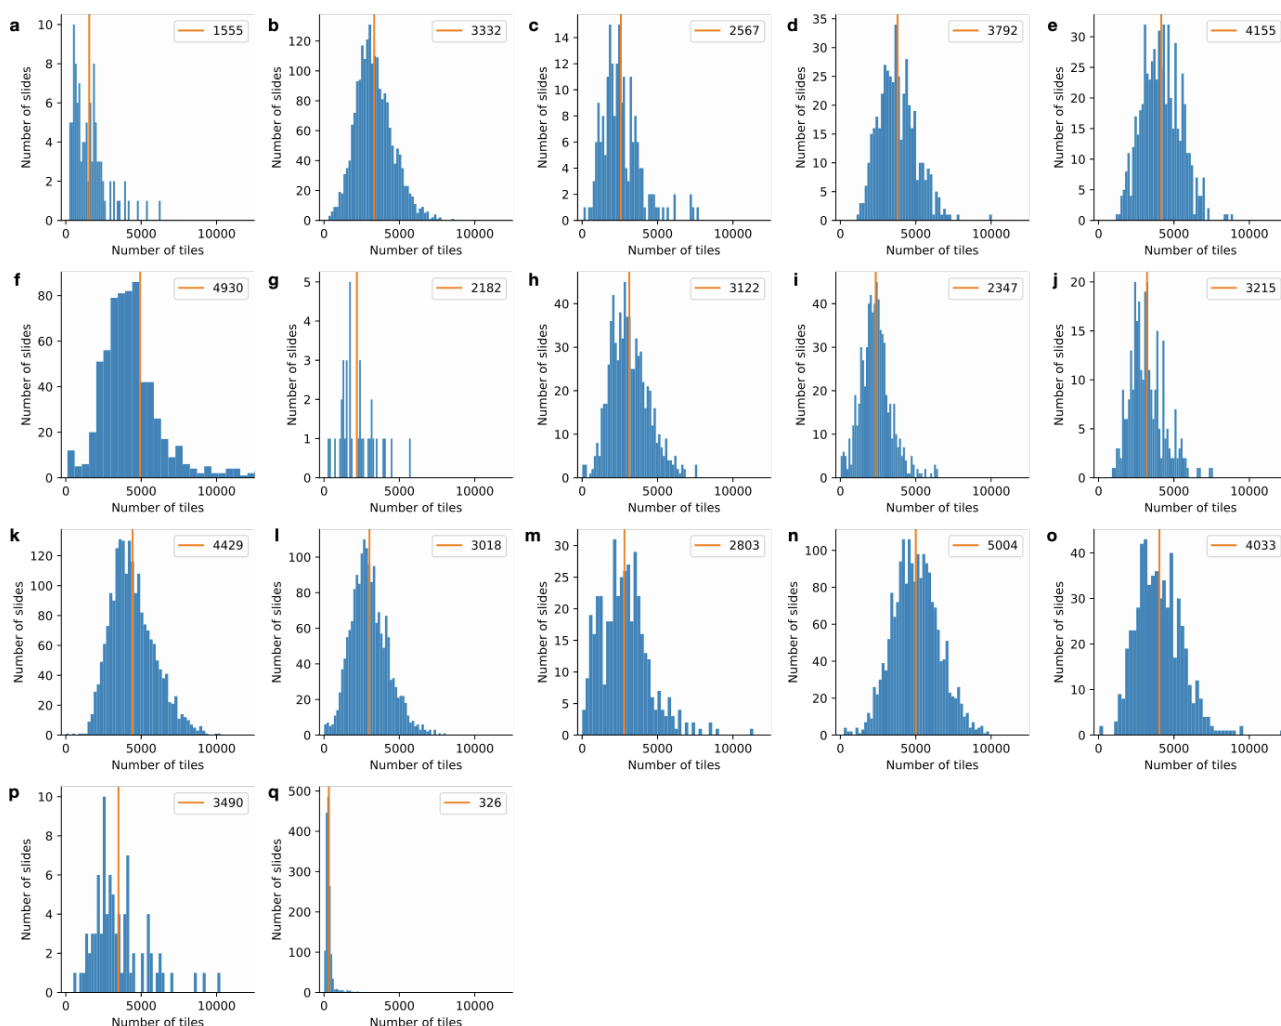

**Supplementary Figure 1: Distribution of the number of tiles per slide for all cohorts, related to cohort overview in Figure 1.** The mean of each distribution is highlighted in orange. a-o) Histogram of the distribution for all 15 cohorts of resections a) CPTAC, b) DACHS, c) DUSSEL, d) ERLANGEN, e) Epi700, f) FOXTROT, g) GUANGZHOU, h) MCO, i) MECC, j) MUNICH, k) NLCS, l) QUASAR, m) TCGA, n) TRANSCOT, and o) YCR-BCIP. p-q) Histogram of the distribution for the biopsy cohorts p) YCR-BCIP and q) MAINZ.

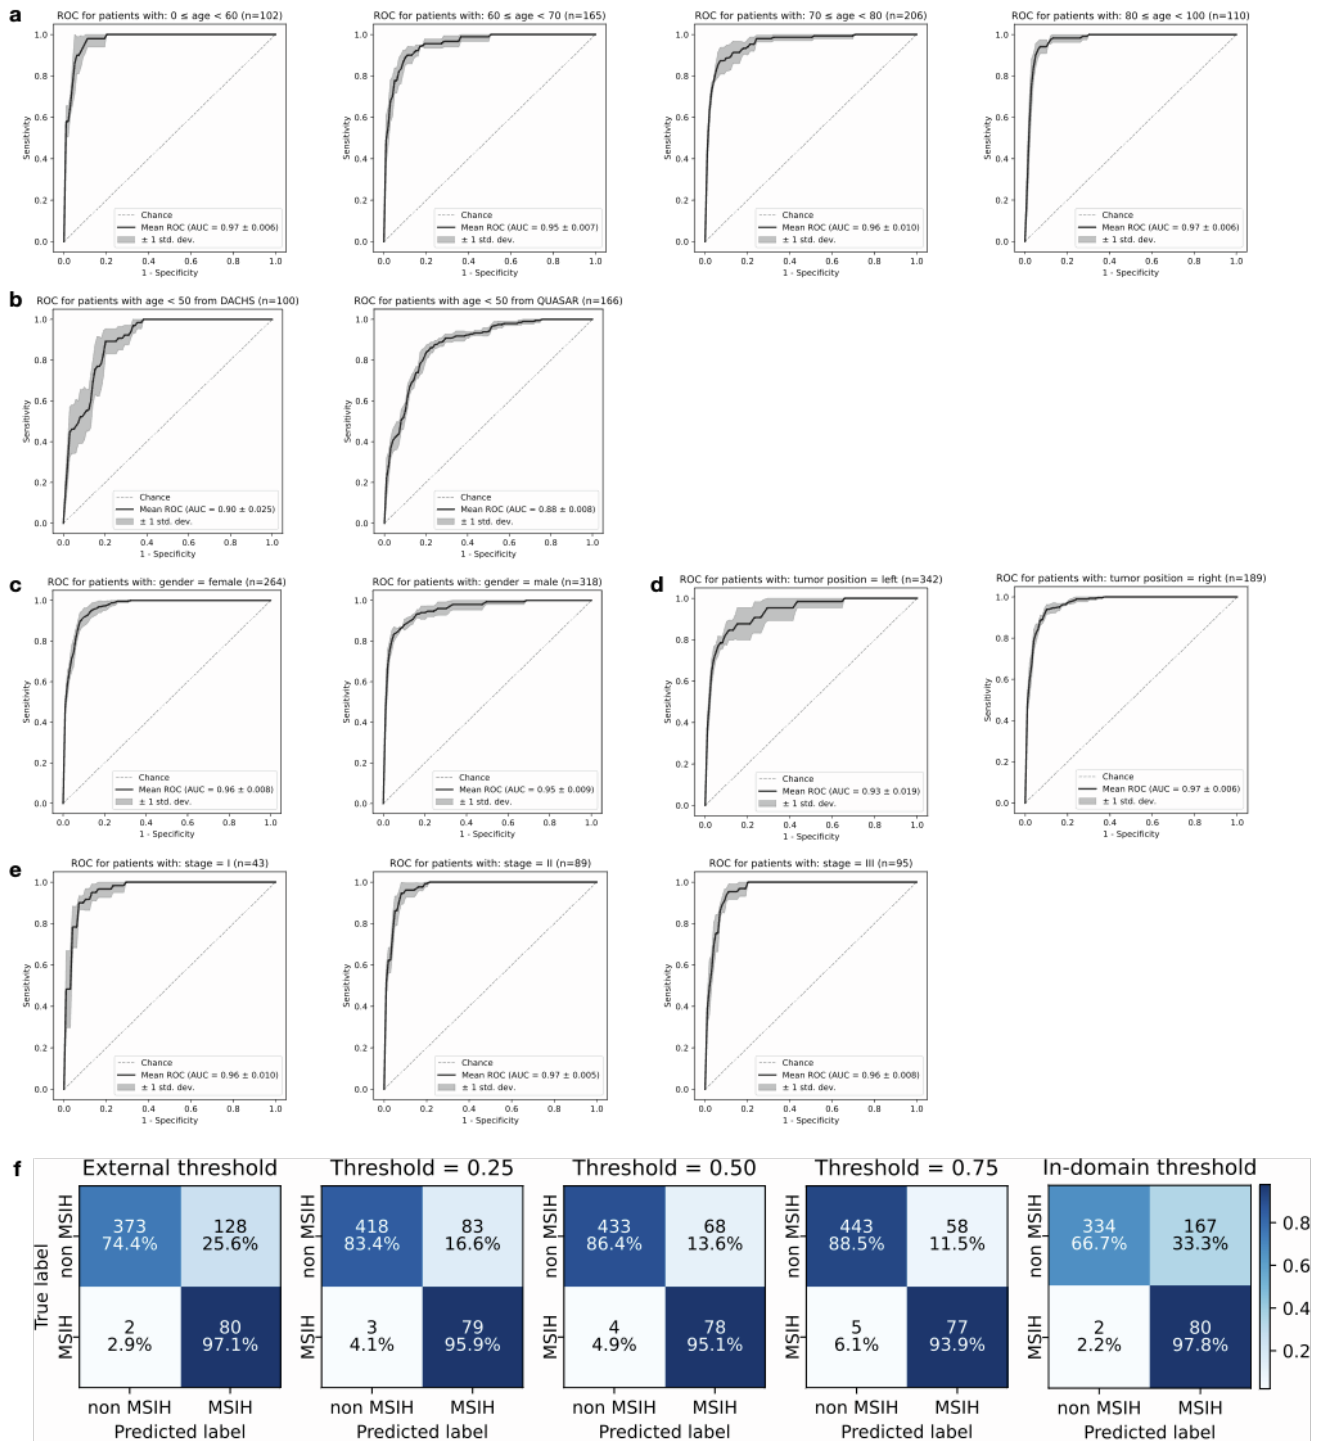

**Supplementary Figure 2: Analysis of clinico-pathological features with receiver operator curves (a-e) and confusion matrix for different classification thresholds (f), related to results in Figure 2.** a) Age groups, below 60, between 60 and 70, between 70 and 80, and above 80 for multi-cohort model evaluated on YCR-BCIP. b) Early onset cancer: model trained on QUASAR, tested on DACHS with 100 patients younger than 50 years and model trained on DACHS, tested on QUASAR with 166 patients younger than 50 years. Both cohorts were chosen because they contain a sufficient number of patients under 50 in contrast to the other cohorts in this study. c-d) Multi-cohort model evaluated on YCR-BCIP. c) ROCs of female and male patients. d) ROCs for patients with left- vs. right-sided tumors. e) ROCs for patients with tumors in stage I, II, and III. f) First column shows the threshold determined on the external tests, such that 0.95 sensitivity is reached. Second to fourth column show fixed thresholds (0.25, 0.5, 0.75, respectively). Last column shows the threshold determined on the in-domain test set, such that 0.95 sensitivity is reached. The results show the average of the model trained on the large multi-centric cohort DACHS, NLCS, QUASAR, and TCGA across all five folds. Results of multi-cohort model evaluated on YCR-BCIP.

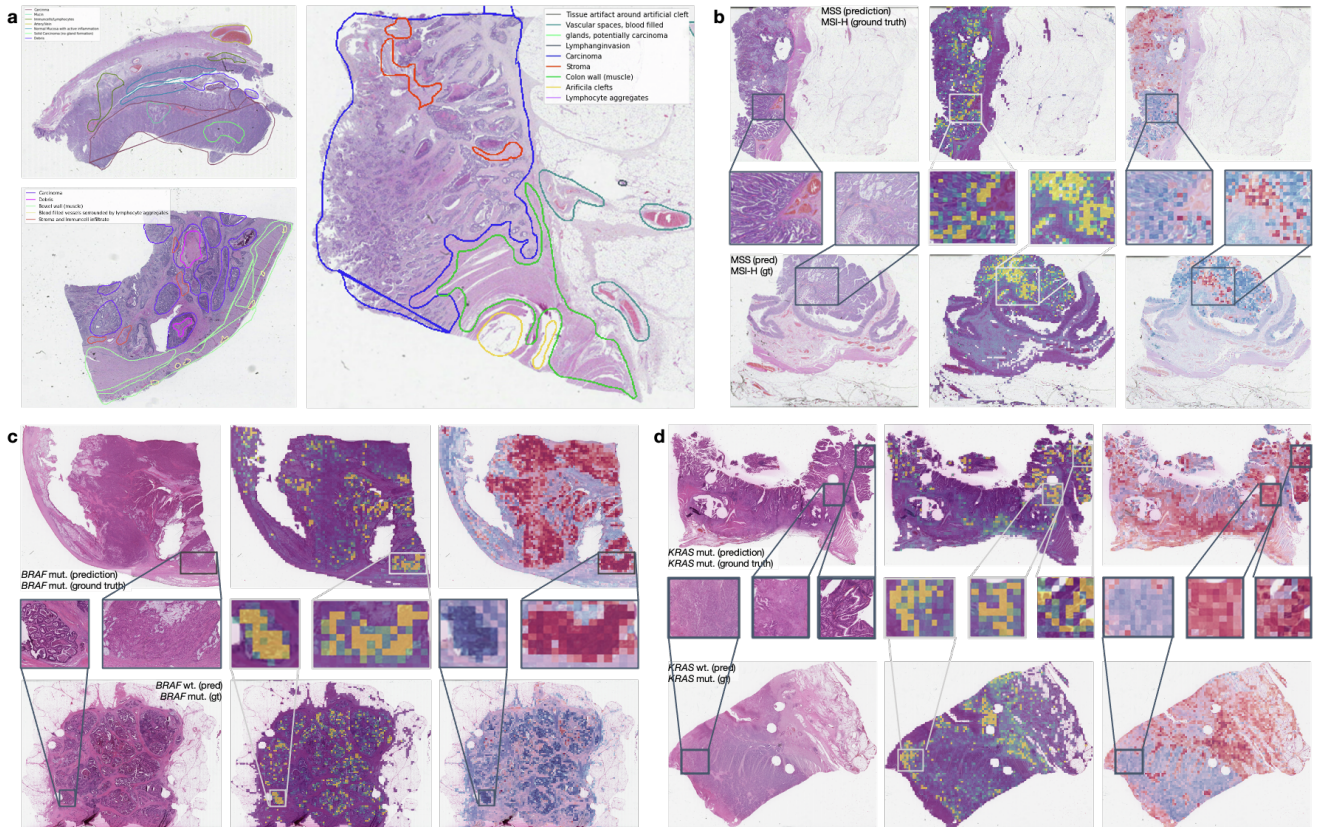

**Supplementary Figure 3: Annotations and additional cases for the interpretability analysis in Figure 3.** a) Manual annotation by a pathologist of the three test cases used for attention visualization from the YCR-BCIP cohort. b-d) Attention and classification score visualizations: left) original WSIs, center) attention score map, right) patch-wise classification score map. b) False negative cases in YCR-BCIP cohort for model trained on multi-cohort dataset. c) Model trained on the cohorts DACHS, QUASAR, MCO, NLCS, TCGA, for *BRAF* predictions, samples from the test cohort Epi700. d) Model trained on the cohorts DACHS, QUASAR, MCO, NLCS, TCGA, for *KRAS* predictions, samples from the test cohort Epi700.

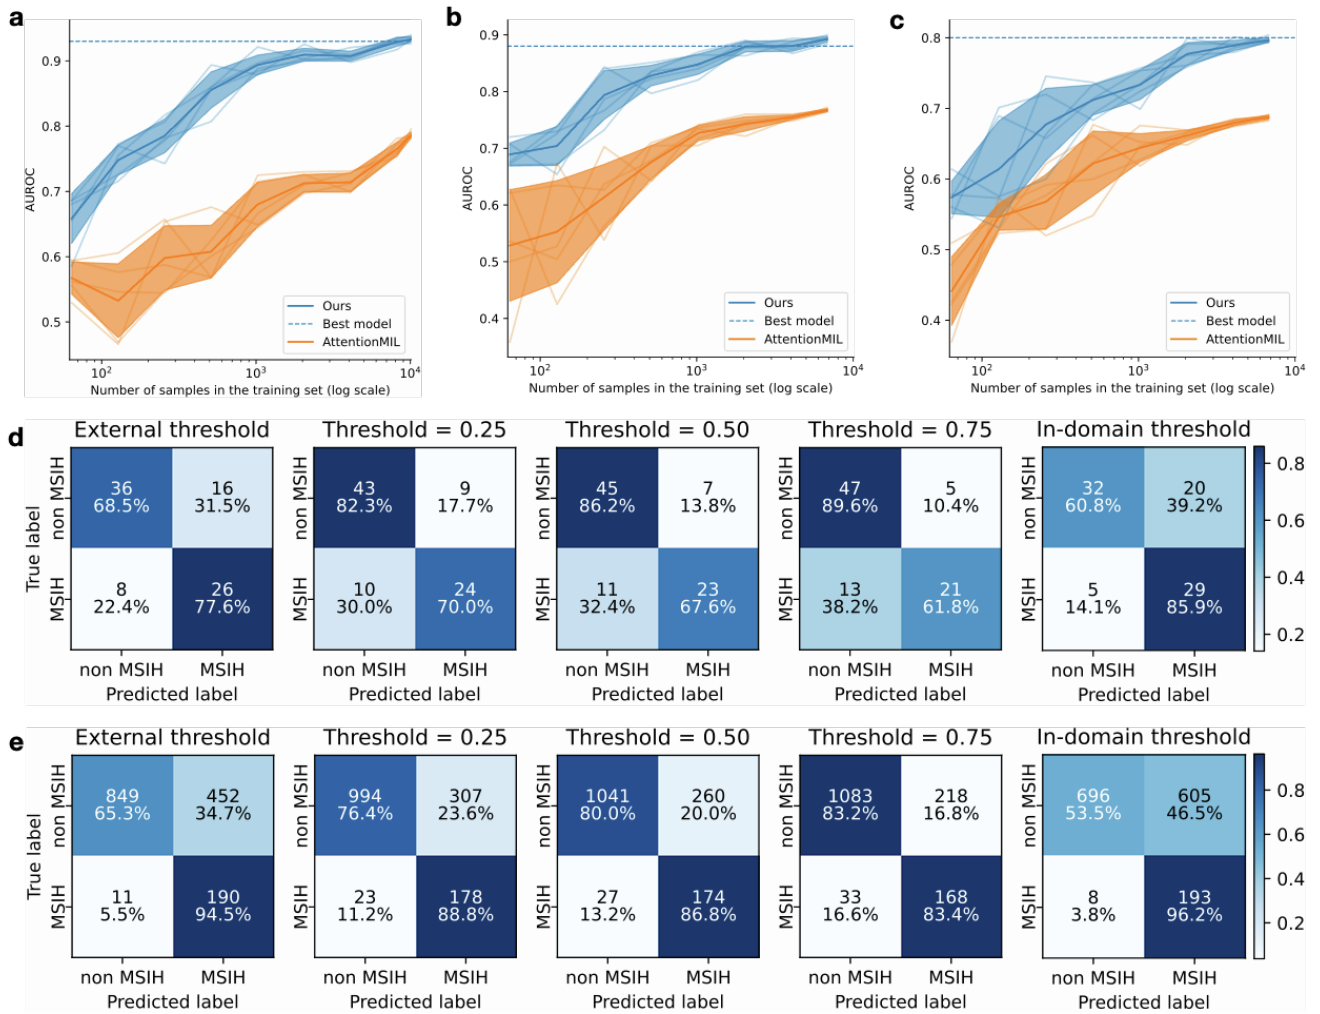

**Supplementary Figure 4: Data efficiency analysis and confusion matrices**, related to **Figure 4**. a-c) AUROC scores depending on the number of patients available for training. The samples were randomly drawn from all resection cohorts with available labels except the external test cohort. a) MSI prediction on YCR-BCIP. b) BRAF prediction on Epi700. c) KRAS prediction on Epi700. d-e) First column shows the threshold determined on the external tests, such that 0.95 sensitivity is reached. Second to fourth column show fixed thresholds (0.25, 0.5, 0.75, respectively). Last column shows the threshold determined on the in-domain test set, such that 0.95 sensitivity is reached. d) Results of multi-cohort model evaluated on the biopsy cohort MAINZ. e) Results of multi-cohort model evaluated on the biopsy cohort YCR-BCIP.

## Supplementary Tables

**Suppl. Table 1: Multi-cohort experiments with statistical endpoints**, related to **Figure 2**. Multi-cohort dataset consisting of CPTAC, DACHS, DUSSEL, Epi700, ERLANGEN, FOxTROT, MCO, MECC, MUNICH, QUASAR, RAINBOW, TCGA, TRANSCOT (all resection cohorts except YCR-BCIP and GUANGZHOU). The models were trained with HistAuGAN stain color augmentation, CTransPath as feature extractor and our transformer model with class token as aggregation model. The thresholds 0.9, 0.925, and 0.95 were determined on the in-domain test set and used for the evaluation on the external test sets. All results for sensitivity, negative predictive value (NPV), and specificity are averaged over the five folds.

| Train                          | Test                           | Target      | AUROC mean | AUROC std dev | Sensitivity (0.95) | NPV (0.95) | Specificity (0.95) | Sensitivity (0.925) | NPV (0.925) | Specificity (0.925) | Sensitivity (0.9) | NPV (0.9) | Specificity (0.9) |
|--------------------------------|--------------------------------|-------------|------------|---------------|--------------------|------------|--------------------|---------------------|-------------|---------------------|-------------------|-----------|-------------------|
| Multi-cohort dataset           | Multi-cohort dataset           | MSI high    | 0.93       | 0.0084        | 0.95               | 0.99       | 0.61               | 0.92                | 0.98        | 0.72                | 0.9               | 0.98      | 0.78              |
| Multi-cohort dataset           | YCR-BCIP-resections            | MSI high    | 0.97       | 0.0041        | 0.995              | 0.998      | 0.41               | 0.99                | 0.995       | 0.56                | 0.98              | 0.995     | 0.67              |
| Multi-cohort dataset           | GUANGZHOU                      | MSI high    | -          | -             | 0.92               | -          | -                  | 0.9                 | -           | -                   | 0.86              | -         | -                 |
| Multi-cohort dataset           | YCR-BCIP-biopsies              | MSI high    | 0.92       | 0.0066        | 0.99               | 0.995      | 0.31               | 0.98                | 0.99        | 0.44                | 0.96              | 0.99      | 0.54              |
| Multi-cohort dataset           | MAINZ                          | MSI high    | 0.86       | 0.0174        | 0.93               | 0.9        | 0.39               | 0.91                | 0.9         | 0.51                | 0.86              | 0.88      | 0.61              |
| DACHS, QUASAR, NLCS, TCGA, MCO | DACHS, QUASAR, NLCS, TCGA, MCO | <i>BRAF</i> | 0.88       | 0.0127        | 0.95               | 0.99       | 0.49               | 0.92                | 0.99        | 0.61                | 0.9               | 0.98      | 0.68              |
| DACHS, QUASAR, NLCS, TCGA, MCO | Epi700                         | <i>BRAF</i> | 0.88       | 0.0103        | 0.94               | 0.98       | 0.55               | 0.91                | 0.98        | 0.65                | 0.88              | 0.97      | 0.71              |
| DACHS, QUASAR, NLCS, TCGA, MCO | DACHS, QUASAR, NLCS, TCGA, MCO | <i>KRAS</i> | 0.71       | 0.0053        | 0.95               | 0.87       | 0.18               | 0.93                | 0.93        | 0.23                | 0.9               | 0.84      | 0.29              |
| DACHS, QUASAR, NLCS, TCGA, MCO | Epi700                         | <i>KRAS</i> | 0.80       | 0.0124        | 0.98               | 0.95       | 0.16               | 0.98                | 0.93        | 0.21                | 0.97              | 0.93      | 0.28              |

**Suppl. Table 2: Ablation study on architecture choices**, related to **Figure 2**. The models were trained with the same pre-processing and feature extractor, only varying the architecture of the aggregation model. All models were trained with 5-fold cross validation.

| Number | Train                        | Test                         | Target | Normali-<br>zation | Feature<br>Extraction                | Aggregation Model                           | AUROC<br>mean | AUROC<br>std dev | AUPRC<br>mean | AUPRC<br>std dev | F1 (0.5)<br>mean | F1 (0.5)<br>std dev | F1 (gmean)<br>mean | F1 (gmean)<br>std dev |
|--------|------------------------------|------------------------------|--------|--------------------|--------------------------------------|---------------------------------------------|---------------|------------------|---------------|------------------|------------------|---------------------|--------------------|-----------------------|
| 2.1.1  | DACHS, NLCS,<br>QUASAR, TCGA | DACHS, NLCS,<br>QUASAR, TCGA | MSI-H  | Macenko            | CTransPath <sup>2</sup> <sub>9</sub> | Transformer with class<br>token (ours)      | 0.95          | 0.0078           | 0.74          | 0.0284           | 0.83             | 0.1257              | 0.80               | 0.1370                |
| 2.2.1  | DACHS, NLCS,<br>QUASAR, TCGA | YCR-BCIP                     | MSI-H  | Macenko            | CTransPath <sup>2</sup> <sub>9</sub> | Transformer with class<br>token (ours)      | <b>0.97</b>   | 0.0041           | 0.83          | 0.0266           | <b>0.83</b>      | 0.1145              | <b>0.84</b>        | 0.1108                |
| 2.3.1  | DACHS, NLCS,<br>QUASAR, TCGA | YCR-BCIP-biopsies            | MSI-H  | Macenko            | CTransPath <sup>2</sup> <sub>9</sub> | Transformer with class<br>token (ours)      | <b>0.91</b>   | 0.0094           | 0.63          | 0.0149           | <b>0.77</b>      | 0.1616              | <b>0.74</b>        | 0.1622                |
| 2.1.2  | DACHS, NLCS,<br>QUASAR, TCGA | DACHS, NLCS,<br>QUASAR, TCGA | MSI-H  | Macenko            | CTransPath <sup>2</sup> <sub>9</sub> | Transformer with<br>global averaging (ours) | 0.95          | 0.0091           | 0.76          | 0.0224           | 0.83             | 0.1268              | 0.81               | 0.1322                |
| 2.2.2  | DACHS, NLCS,<br>QUASAR, TCGA | YCR-BCIP                     | MSI-H  | Macenko            | CTransPath <sup>2</sup> <sub>9</sub> | Transformer with<br>global averaging (ours) | <b>0.97</b>   | 0.0042           | <b>0.84</b>   | 0.0131           | 0.82             | 0.1272              | 0.83               | 0.1191                |
| 2.3.2  | DACHS, NLCS,<br>QUASAR, TCGA | YCR-BCIP-biopsies            | MSI-H  | Macenko            | CTransPath <sup>2</sup> <sub>9</sub> | Transformer with<br>global averaging (ours) | <b>0.91</b>   | 0.0078           | <b>0.64</b>   | 0.0206           | 0.75             | 0.1795              | <b>0.74</b>        | 0.1582                |
| 2.1.3  | DACHS, NLCS,<br>QUASAR, TCGA | DACHS, NLCS,<br>QUASAR, TCGA | MSI-H  | Macenko            | CTransPath <sup>2</sup> <sub>9</sub> | AttentionMIL <sup>23</sup>                  | 0.94          | 0.0103           | 0.71          | 0.0184           | 0.79             | 0.1477              | 0.77               | 0.1543                |
| 2.2.3  | DACHS, NLCS,<br>QUASAR, TCGA | YCR-BCIP                     | MSI-H  | Macenko            | CTransPath <sup>2</sup> <sub>9</sub> | AttentionMIL <sup>23</sup>                  | 0.96          | 0.0025           | 0.80          | 0.0101           | 0.78             | 0.1413              | 0.82               | 0.1202                |
| 2.3.3  | DACHS, NLCS,<br>QUASAR, TCGA | YCR-BCIP-biopsies            | MSI-H  | Macenko            | CTransPath <sup>2</sup> <sub>9</sub> | AttentionMIL <sup>23</sup>                  | 0.90          | 0.0042           | 0.60          | 0.0154           | 0.76             | 0.1601              | <b>0.74</b>        | 0.1595                |
| 2.1.4  | DACHS, NLCS,<br>QUASAR, TCGA | DACHS, NLCS,<br>QUASAR, TCGA | MSI-H  | Macenko            | CTransPath <sup>2</sup> <sub>9</sub> | TransMIL <sup>32</sup>                      | 0.94          | 0.0101           | 0.72          | 0.0379           | 0.82             | 0.1387              | 0.79               | 0.1500                |
| 2.2.4  | DACHS, NLCS,<br>QUASAR, TCGA | YCR-BCIP                     | MSI-H  | Macenko            | CTransPath <sup>2</sup> <sub>9</sub> | TransMIL <sup>32</sup>                      | 0.96          | 0.0033           | 0.79          | 0.0200           | 0.84             | 0.1157              | 0.83               | 0.1155                |
| 2.3.4  | DACHS, NLCS,<br>QUASAR, TCGA | YCR-BCIP-biopsies            | MSI-H  | Macenko            | CTransPath <sup>2</sup> <sub>9</sub> | TransMIL <sup>32</sup>                      | 0.89          | 0.0122           | 0.57          | 0.0178           | 0.72             | 0.2215              | 0.70               | 0.1736                |

**Suppl. Table 3: STARD (STAndards for the Reporting of Diagnostic accuracy studies) Checklist, related to STAR Methods.**

| Section & Topic         | No  | Item                                                                                                                                                   | Reported |
|-------------------------|-----|--------------------------------------------------------------------------------------------------------------------------------------------------------|----------|
| TITLE OR ABSTRACT       | 1   | Identification as a study of diagnostic accuracy using at least one measure of accuracy (such as sensitivity, specificity, predictive values, or AUC)  | yes      |
| ABSTRACT                | 2   | Structured summary of study design, methods, results, and conclusions (for specific guidance, see STARD for Abstracts)                                 | yes      |
| INTRODUCTION            | 3   | Scientific and clinical background, including the intended use and clinical role of the index test                                                     | yes      |
|                         | 4   | Study objectives and hypotheses                                                                                                                        | yes      |
| METHODS<br>Study design | 5   | Whether data collection was planned before the index test and reference standard were performed (prospective study) or after (retrospective study)     |          |
| METHODS<br>Participants | 6   | Eligibility criteria                                                                                                                                   |          |
|                         | 7   | On what basis potentially eligible participants were identified (such as symptoms, results from previous tests, inclusion in registry)                 |          |
|                         | 8   | Where and when potentially eligible participants were identified (setting, location and dates)                                                         |          |
|                         | 9   | Whether participants formed a consecutive, random or convenience series                                                                                |          |
| METHODS<br>Test methods | 10a | Index test, in sufficient detail to allow replication                                                                                                  | yes      |
|                         | 10b | Reference standard, in sufficient detail to allow replication                                                                                          | yes      |
|                         | 11  | Rationale for choosing the reference standard (if alternatives exist)                                                                                  |          |
|                         | 12a | Definition of and rationale for test positivity cut-offs or result categories of the index test, distinguishing pre-specified from exploratory         | yes      |
|                         | 12b | Definition of and rationale for test positivity cut-offs or result categories of the reference standard, distinguishing pre-specified from exploratory |          |
|                         | 13a | Whether clinical information and reference standard results were available to the performers/readers of the index test                                 |          |
|                         | 13b | Whether clinical information and index test results were available to the assessors of the reference standard                                          |          |
| METHODS<br>Analysis     | 14  | Methods for estimating or comparing measures of diagnostic accuracy                                                                                    | yes      |
|                         | 15  | How indeterminate index test or reference standard results were handled                                                                                |          |
|                         | 16  | How missing data on the index test and reference standard were handled                                                                                 | yes      |
|                         | 17  | Any analyses of variability in diagnostic accuracy, distinguishing pre-specified from exploratory                                                      |          |
|                         | 18  | Intended sample size and how it was determined                                                                                                         | yes      |
| RESULTS<br>Participants | 19  | Flow of participants, using a diagram                                                                                                                  |          |



| Section & Topic         | No  | Item                                                                                                        | Reported |
|-------------------------|-----|-------------------------------------------------------------------------------------------------------------|----------|
|                         | 20  | Baseline demographic and clinical characteristics of participants                                           | yes      |
|                         | 21a | Distribution of severity of disease in those with the target condition                                      |          |
|                         | 21b | Distribution of alternative diagnoses in those without the target condition                                 | yes      |
|                         | 22  | Time interval and any clinical interventions between index test and reference standard                      |          |
| RESULTS<br>Test results | 23  | Cross tabulation of the index test results (or their distribution) by the results of the reference standard |          |
|                         | 24  | Estimates of diagnostic accuracy and their precision (such as 95% confidence intervals)                     | yes      |
|                         | 25  | Any adverse events from performing the index test or the reference standard                                 |          |
| DISCUSSION              | 26  | Study limitations, including sources of potential bias, statistical uncertainty, and generalisability       | yes      |
|                         | 27  | Implications for practice, including the intended use and clinical role of the index test                   |          |
| OTHER<br>INFORMATION    | 28  | Registration number and name of registry                                                                    |          |
|                         | 29  | Where the full study protocol can be accessed                                                               |          |
|                         | 30  | Sources of funding and other support; role of funders                                                       | yes      |

**Suppl. Table 4: Patient cohorts used in this study and their characteristics, related to Figure 1.** Clinico-pathological data were provided by the respective study principal investigators. In all cases, the TNM version from the original study registry was used. Information about the localization of the tumor was either provided as a binary variable (left-sided vs. right-sided) by the study site or assigned by the authors as follows: the cecum, ascending colon, hepatic flexure and transverse colon were defined as a right-sided tumor location whereas the splenic flexure, descending colon, sigmoid colon and rectum were defined as left-sided. \*Number of patients before dropout of samples. \*\*for the MECC cohort, these statistics refer to the cases with available MSI/dMMR status only.

|                                          | CPTAC                             | DACHS         | DUSSEL        | Epi700            | ERLANGEN   | FOXTROT        | GUANGZHOU  | MAINZ      | MCO          | MECC**     | MUNICH       | NLCS         | QUASAR                  | TCGA                     | TRANSCOT       | YCR-BCIP       | YCR-BCIP biopsies |
|------------------------------------------|-----------------------------------|---------------|---------------|-------------------|------------|----------------|------------|------------|--------------|------------|--------------|--------------|-------------------------|--------------------------|----------------|----------------|-------------------|
| <b>Origin</b>                            | United States                     | Germany       | Germany       | Northern Ireland  | Germany    | United Kingdom | China      | Germany    | Australia    | Israel     | Germany      | Netherlands  | United Kingdom          | United States            | United Kingdom | United Kingdom | United Kingdom    |
| <b>Number of patients*</b>               | 110                               | 2448          | 330           | 661               | 627        | 1053           | 35         | 90         | 1511         | 683        | 292          | 2452         | 2190                    | 632                      | 1988           | 889            | 1557              |
| <b>WSI format</b>                        | SVS                               | SVS           | SVS           | SVS               | MRXS       | SVS            | MRXS       | SVS        | SVS          | TIF        | SVS          | TIFF/SVS     | SVS                     | SVS                      | SVS            | SVS            | SVS               |
| <b>MSI-H/dMMR ground truth</b>           | MuTect2 <sup>3</sup> <sub>8</sub> | PCR 3-plex    | IHC 2-plex    | PCR/IHC consensus | IHC 4-plex | IHC 4-plex     | IHC 4-plex | IHC 4-plex | IHC 4-plex   | PCR 5-plex | IHC 4-plex   | IHC 2-plex   | IHC 4-plex / IHC 2-plex | PCR 5-plex <sup>72</sup> | IHC            | IHC 4-plex     | IHC 4-plex        |
| <b>MSI-H/dMMR, n (%)</b>                 | 24 (22%)                          | 210 (9%)      | 45 (14%)      | 134 (20%)         | 113 (18%)  | 185 (18%)      | 35 (100%)  | 36 (40%)   | 238 (16%)    | 106 (16%)  | 34 (12%)     | 259 (11%)    | 246 (11%)               | 65 (10%)                 | 229 (12%)      | 129 (15%)      | 211 (14%)         |
| <b>MSS/pMMR, n (%)</b>                   | 81 (74%)                          | 1836 (75%)    | 268 (81%)     | 469 (71%)         | 407 (65%)  | 728 (69%)      | 0 (0%)     | 54 (60%)   | 1268 (85%)   | 577 (84%)  | 258 (88%)    | 2193 (89%)   | 1529 (70%)              | 392 (62%)                | 1759 (88%)     | 760 (85%)      | 1346 (86%)        |
| <b>Mean age at diagnosis (std. dev.)</b> | 65.67 (11.38)                     | 68.46 (10.82) | 68.57 (11.77) | 70.63 (11.4)      | N/A        | N/A            | N/A        | N/A        | 68.4 (12.51) | 69.8       | 56.1 (11.84) | 73.71 (6.04) | 62.20 (9.60)            | 66.42 (12.67)            | 63.84 (9.11)   | 70.31 (9.97)   | 71.79 (9.97)      |
| <b>Colon cancer, n (%)</b>               | 110 (100%)                        | 1488 (61%)    | 204 (62%)     | 659 (99.7%)       | N/A        | N/A            | N/A        | N/A        | 955 (63%)    | 530 (78%)  | N/A          | 1730 (71%)   | 1474 (67%)              | 341 (54%)                | N/A            | 667 (75%)      | 876 (56%)         |
| <b>Rectal cancer, n (%)</b>              | 0 (0%)                            | 960 (39%)     | 116 (35%)     | 2 (0.3%)          | N/A        | N/A            | N/A        | N/A        | 552 (37%)    | 123 (18%)  | N/A          | 722 (29%)    | 526 (24%)               | 118 (19%)                | N/A            | 215 (24%)      | 662 (43%)         |
| <b>Site unknown, n (%)</b>               | 0 (0%)                            | 0 (0%)        | 10 (3%)       | 0 (0%)            | N/A        | N/A            | N/A        | N/A        | 4 (0%)       | 30 (4%)    | N/A          | 0 (0%)       | 190 (9%)                | 173 (27%)                | N/A            | 7 (1%)         | 19 (1%)           |
| <b>Female, n (%)</b>                     | 65 (59%)                          | 1012 (41%)    | 181 (55%)     | 303 (46%)         | N/A        | N/A            | N/A        | N/A        | 685 (45%)    | 320 (47%)  | 132 (45%)    | 1079 (44%)   | 848 (39%)               | 292 (46%)                | 802 (40%)      | 395 (44%)      | 620 (40%)         |
| <b>Male, n (%)</b>                       | 45 (41%)                          | 1436 (59%)    | 149 (45%)     | 358 (54%)         | N/A        | N/A            | N/A        | N/A        | 826 (55%)    | 363 (53%)  | 160 (55%)    | 1373 (56%)   | 1334 (61%)              | 322 (51%)                | 1186 (60%)     | 494 (56%)      | 933 (60%)         |
| <b>gender unknown</b>                    | 0 (0%)                            | 0 (0%)        | 0 (0%)        | 0 (0%)            | N/A        | N/A            | N/A        | N/A        | 0 (0%)       | 0 (0%)     | 0 (0%)       | 0 (0%)       | 8 (0%)                  | 18 (3%)                  | 0 (0%)         | 0 (0%)         | 4 (0%)            |
| <b>UICC stage I, n (%)</b>               | 12 (11%)                          | 485 (20%)     | 76 (23%)      | 0 (0%)            | N/A        | N/A            | N/A        | N/A        | 289 (19%)    | 94 (14%)   | 52 (18%)     | 485 (20%)    | 1 (0%)                  | 76 (12%)                 | N/A            | 169 (19%)      | 2 (0%)            |
| <b>UICC stage II, n (%)</b>              | 42 (38%)                          | 801 (33%)     | 138 (42%)     | 394 (60%)         | N/A        | N/A            | N/A        | N/A        | 542 (36%)    | 335 (49%)  | 118 (40%)    | 918 (37%)    | 1988 (91%)              | 166 (26%)                | N/A            | 317 (36%)      | 2 (0%)            |
| <b>UICC stage III, n (%)</b>             | 48 (44%)                          | 822 (34%)     | 110 (33%)     | 267 (40%)         | N/A        | N/A            | N/A        | N/A        | 503 (33%)    | 123 (18%)  | 82 (28%)     | 641 (26%)    | 192 (9%)                | 140 (22%)                | N/A            | 370 (42%)      | 5 (0%)            |
| <b>UICC stage IV, n</b>                  | 8                                 | 337           | 6             | 0                 | N/A        | N/A            | N/A        | N/A        | 177          | 67         | 39           | 341          | 0                       | 63                       | N/A            | 0              | 0                 |

|                                   | CPTAC       | DACHS         | DUSSEL       | Epi700       | ERLANGEN | FOXROT | GUANGZHOU | MAINZ | MCO           | MECC**       | MUNICH       | NLCS          | QUASAR        | TCGA         | TRANSCOT      | YCR-BCIP     | YCR-BCIP<br>biopsies |
|-----------------------------------|-------------|---------------|--------------|--------------|----------|--------|-----------|-------|---------------|--------------|--------------|---------------|---------------|--------------|---------------|--------------|----------------------|
| (%)                               | (7%)        | (14%)         | (2%)         | (0%)         |          |        |           |       | (12%)         | (10%)        | (13%)        | (14%)         | (0%)          | (10%)        |               | (0%)         | (0%)                 |
| <b>UICC stage unknown, n (%)</b>  | 0<br>(0%)   | 3<br>(0%)     | 0<br>(0%)    | 0<br>(0%)    | N/A      | N/A    | N/A       | N/A   | 0<br>(0%)     | 64<br>(9%)   | 1<br>(0%)    | 67<br>(3%)    | 9<br>(0%)     | 187<br>(30%) | N/A           | 33<br>(3%)   | 1548<br>(99%)        |
| <b>BRAF mutation, n (%)</b>       | N/A         | 151<br>(6%)   | N/A          | 91<br>(14%)  | N/A      | N/A    | N/A       | N/A   | 190<br>(13%)  | 49<br>(7%)   | N/A          | 305<br>(12%)  | 120<br>(5%)   | 63<br>(10%)  | N/A           | 75<br>(8%)   | 139<br>(9%)          |
| <b>BRAF wild type, n (%)</b>      | N/A         | 1930<br>(79%) | N/A          | 550<br>(84%) | N/A      | N/A    | N/A       | N/A   | 1271<br>(84%) | 570<br>(83%) | N/A          | 1733<br>(71%) | 1358<br>(62%) | 471<br>(75%) | N/A           | 32<br>(4%)   | 36<br>(2%)           |
| <b>BRAF status unknown, n (%)</b> | N/A         | 367<br>(15%)  | N/A          | 16<br>(2%)   | N/A      | N/A    | N/A       | N/A   | 50<br>(3%)    | 64<br>(9%)   | N/A          | 414<br>(17%)  | 712<br>(33%)  | 98<br>(15%)  | N/A           | 782<br>(88%) | 1382<br>(89%)        |
| <b>KRAS mutation, n (%)</b>       | N/A         | 677<br>(28%)  | N/A          | 247<br>(38%) | N/A      | N/A    | N/A       | N/A   | 460<br>(30%)  | 252<br>(37%) | N/A          | 698<br>(28%)  | 555<br>(25%)  | 218<br>(34%) | N/A           | N/A          | N/A                  |
| <b>KRAS wild type, n (%)</b>      | N/A         | 1397<br>(57%) | N/A          | 398<br>(61%) | N/A      | N/A    | N/A       | N/A   | 1001<br>(66%) | 405<br>(59%) | N/A          | 1335<br>(54%) | 882<br>(40%)  | 316<br>(50%) | N/A           | N/A          | N/A                  |
| <b>KRAS status unknown</b>        | N/A         | 347<br>(15%)  | N/A          | 12<br>(2%)   | N/A      | N/A    | N/A       | N/A   | 50<br>(3%)    | 26<br>(4%)   | N/A          | 419<br>(17%)  | 753<br>(35%)  | 98<br>(16%)  | N/A           | N/A          | N/A                  |
| <b>right-sided tumor, n (%)</b>   | 58<br>(53%) | 819<br>(33%)  | 72<br>(22%)  | 375<br>(57%) | N/A      | N/A    | N/A       | N/A   | 589<br>(39%)  | 238<br>(35%) | 53<br>(18%)  | 946<br>(39%)  | 754<br>(34%)  | 176<br>(28%) | 779<br>(39%)  | 331<br>(37%) | 395<br>(25%)         |
| <b>left-sided tumor, n (%)</b>    | 51<br>(46%) | 1607<br>(66%) | 226<br>(68%) | 280<br>(42%) | N/A      | N/A    | N/A       | N/A   | 918<br>(61%)  | 409<br>(60%) | 239<br>(82%) | 1506<br>(61%) | 1158<br>(53%) | 248<br>(39%) | 1180<br>(60%) | 486<br>(55%) | 1055<br>(68%)        |
| <b>sidedness unknown, n (%)</b>   | 1<br>(1%)   | 22<br>(1%)    | 32<br>(10%)  | 6<br>(1%)    | N/A      | N/A    | N/A       | N/A   | 4<br>(0%)     | 36<br>(5%)   | 0<br>(0%)    | 0<br>(0%)     | 150<br>(13%)  | 208<br>(33%) | 29<br>(1%)    | 72<br>(8%)   | 107<br>(7%)          |

**Suppl. Table 5 Mean AUROC scores of 5-fold CV training on single cohorts, evaluated on all other cohorts, related to Figure 2.** The training cohorts are listed in the columns and entries in the diagonal are in-domain test results.

| Train (↓)       | NLCS | DACHS | TRANSCOT | QUASAR | MCO  | YCR-BCIP | FOxTROT | MECC | Epi700 | ERLANGEN | TCGA | MUNICH | DUSSEL | CPTAC |
|-----------------|------|-------|----------|--------|------|----------|---------|------|--------|----------|------|--------|--------|-------|
| <b>NLCS</b>     | 0.93 | 0.92  | 0.93     | 0.93   | 0.93 | 0.95     | 0.88    | 0.78 | 0.92   | 0.72     | 0.89 | 0.85   | 0.83   | 0.89  |
| <b>DACHS</b>    | 0.91 | 0.96  | 0.91     | 0.92   | 0.93 | 0.92     | 0.86    | 0.76 | 0.91   | 0.74     | 0.87 | 0.83   | 0.83   | 0.87  |
| <b>TRANSCOT</b> | 0.91 | 0.91  | 0.93     | 0.93   | 0.92 | 0.95     | 0.87    | 0.76 | 0.93   | 0.75     | 0.89 | 0.86   | 0.80   | 0.85  |
| <b>QUASAR</b>   | 0.93 | 0.92  | 0.93     | 0.96   | 0.93 | 0.95     | 0.89    | 0.76 | 0.93   | 0.72     | 0.88 | 0.88   | 0.81   | 0.91  |
| <b>MCO</b>      | 0.92 | 0.91  | 0.92     | 0.93   | 0.94 | 0.94     | 0.88    | 0.78 | 0.92   | 0.75     | 0.87 | 0.87   | 0.82   | 0.88  |
| <b>YCR-BCIP</b> | 0.90 | 0.87  | 0.91     | 0.91   | 0.92 | 0.95     | 0.86    | 0.76 | 0.91   | 0.76     | 0.87 | 0.86   | 0.82   | 0.92  |
| <b>FOxTROT</b>  | 0.83 | 0.82  | 0.89     | 0.82   | 0.80 | 0.87     | 0.81    | 0.70 | 0.84   | 0.71     | 0.80 | 0.77   | 0.79   | 0.82  |
| <b>MECC</b>     | 0.85 | 0.82  | 0.88     | 0.86   | 0.85 | 0.88     | 0.81    | 0.77 | 0.86   | 0.68     | 0.81 | 0.77   | 0.80   | 0.79  |
| <b>Epi700</b>   | 0.90 | 0.90  | 0.92     | 0.93   | 0.93 | 0.94     | 0.87    | 0.77 | 0.95   | 0.72     | 0.87 | 0.88   | 0.80   | 0.88  |
| <b>ERLANGEN</b> | 0.80 | 0.81  | 0.86     | 0.78   | 0.80 | 0.85     | 0.77    | 0.66 | 0.82   | 0.76     | 0.76 | 0.80   | 0.77   | 0.68  |
| <b>TCGA</b>     | 0.82 | 0.86  | 0.84     | 0.85   | 0.83 | 0.88     | 0.80    | 0.72 | 0.85   | 0.70     | 0.83 | 0.84   | 0.76   | 0.82  |
| <b>MUNICH</b>   | 0.77 | 0.78  | 0.79     | 0.80   | 0.80 | 0.84     | 0.74    | 0.65 | 0.81   | 0.72     | 0.76 | 0.85   | 0.76   | 0.71  |
| <b>DUSSEL</b>   | 0.72 | 0.75  | 0.83     | 0.75   | 0.71 | 0.81     | 0.74    | 0.65 | 0.74   | 0.70     | 0.69 | 0.67   | 0.71   | 0.69  |
| <b>CPTAC</b>    | 0.74 | 0.74  | 0.78     | 0.74   | 0.71 | 0.81     | 0.72    | 0.67 | 0.77   | 0.70     | 0.69 | 0.67   | 0.71   | 0.73  |
